# Supplementary material for: Exploitation or economic prosperity: What is the intersection between Aboriginal self- determination and corporate activities in Northern Australia’s media discourse
Source: Research Square preprint supplement (doi:10.21203/rs.3.rs-8303489/v1), 2026-01-22
Supplement: Supplementary file 1 [file 8e57baa002ff4fca94d6dd5c.pdf]

Additional Figure 2: Media search Inclusion and Exclusion criteria

|                 | Inclusion criteria                                                                                                                                                                                                                             | Exclusion criteria                                                                                                                                                                                                 |
|-----------------|------------------------------------------------------------------------------------------------------------------------------------------------------------------------------------------------------------------------------------------------|--------------------------------------------------------------------------------------------------------------------------------------------------------------------------------------------------------------------|
| Population      | Aboriginal People in the Northern Territory of Australia.<br>Specific people groups from the Northern Territory for example Larrakia, Warlpiri, Alawa etc                                                                                      | Non-Indigenous focus or Indigenous people from outside the Northern Territory                                                                                                                                      |
|                 | Published in an Australian source<br>Published between 01 July 2015 and 01 July 2025<br>Contains representation of corporate activities undertaken by the alcohol, food, extractive resources industries<br>Relevant to the Northern Territory | No representation of corporate activities undertaken by the alcohol, food, and extractive resources industries<br>Relevant to the Northern Territory<br>Agriculture aquaculture horticulture<br>Primary industries |
| News media type | Articles published between 2015-2025<br>Available on Factiva or Newsbank<br>Published in English                                                                                                                                               | Published before 15th July 2015<br>Independent media sources not published in Factiva or Newsbank                                                                                                                  |
| Location        | Northern Territory focused including Commonwealth relevant news if focused on the Northern Territory                                                                                                                                           | International or other Australian States and Territories Not relevant to the NT                                                                                                                                    |
