# Supplementary material for: Exploitation or economic prosperity: What is the intersection between Aboriginal self- determination and corporate activities in Northern Australia’s media discourse
Source: Research Square preprint supplement (doi:10.21203/rs.3.rs-8303489/v1), 2026-01-22
Supplement: Supplementary file 2 [file ed681dfa689f3a19d2395ac3.pdf]

Additional Figure1: Search Terms

|                                |                                                                                                                                                                                                                                                                                                                                                                                                                                                                                                                                                                                                                                                                                                                                                                                                                                                                                                                                                          |
|--------------------------------|----------------------------------------------------------------------------------------------------------------------------------------------------------------------------------------------------------------------------------------------------------------------------------------------------------------------------------------------------------------------------------------------------------------------------------------------------------------------------------------------------------------------------------------------------------------------------------------------------------------------------------------------------------------------------------------------------------------------------------------------------------------------------------------------------------------------------------------------------------------------------------------------------------------------------------------------------------|
| Alcohol (Factiva)              | <p>("alcohol" or "booze" or "grog" or "liquor" or "bottle shop" or "bottle-o" or "pub" or "hotel") AND ("sector" or "compan*" or "commercial" or "firm" "peak bod*" or "business*" or "enterprise*" or "corporat*" or "organisation" or "Industr*") AND ("Aboriginal" or "Indigenous" or "First Nations" or "First Peoples" or "Traditional Owners") AND ("NT" or "Northern Territory" ) NOT "breaking news" NOT "blog" NOT "report"</p> <p>Delimiters:</p> <p>Date 01/07/2015-01/07/2025</p> <p>Sources: NOT blogs, business sources, business to consumer services, dow jones sources, european union sources, general interest sources, government and politics, legal sources, nongovernmental organizations, official government sources, research reports, sports, think tanks, top industry sources, transcripts, wires, trade (b2b)</p> <p>Region: Australia/Oceania</p> <p>Language: English</p>                                                |
| Food (Factiva)                 | <p>("food" or "grocer*" or "supermarket*" or "fast food" or "junk food" or "store*" or "retail" or "shop") AND ("sector" or "compan*" or "commercial" or "firm" "peak bod*" or "business*" or "enterprise*" or "corporat*" or "organisation" or "Industr*") AND ("Aboriginal" or "Indigenous" or "First Nations" or "First Peoples" or "Traditional Owners") AND ("NT" or "Northern Territory" ) NOT "breaking news" NOT "blog" NOT "report"</p> <p>Delimiters:</p> <p>Date 01/07/2015-01/07/2025</p> <p>Sources: NOT blogs, business sources, business to consumer services, dow jones sources, european union sources, general interest sources, government and politics, legal sources, nongovernmental organizations, official government sources, research reports, sports, think tanks, top industry sources, transcripts, wires, trade (b2b)</p> <p>Region: Australia/Oceania</p> <p>Language: English</p>                                        |
| Extractive resources (Factiva) | <p>("mining" or "mine*" or "extractive resource*" or "mineral" or "energy" or "renewable*" or "resource extract*" or "fracking" or "exploration") AND ("sector" or "compan*" or "commercial" or "firm" "peak bod*" or "business*" or "enterprise*" or "corporat*" or "organisation" or "Industr*") AND ("Aboriginal" or "Indigenous" or "First Nations" or "First Peoples" or "Traditional Owners") AND ("NT" or "Northern Territory" ) NOT "breaking news" NOT "blog" NOT "report"</p> <p>Delimiters:</p> <p>Date 01/07/2015-01/07/2025</p> <p>Sources: NOT blogs, business sources, business to consumer services, dow jones sources, european union sources, general interest sources, government and politics, legal sources, nongovernmental organizations, official government sources, research reports, sports, think tanks, top industry sources, transcripts, wires, trade (b2b)</p> <p>Region: Australia/Oceania</p> <p>Language: English</p> |

|                                       |                                                                                                                                                                                                                                                                                                                                                                                                                                                                                                                                                                                                                                  |
|---------------------------------------|----------------------------------------------------------------------------------------------------------------------------------------------------------------------------------------------------------------------------------------------------------------------------------------------------------------------------------------------------------------------------------------------------------------------------------------------------------------------------------------------------------------------------------------------------------------------------------------------------------------------------------|
| Alcohol<br>(Newsbank)                 | <p>("alcohol" or "booze" or "grog" or "liquor" or "bottle shop" or "bottle-o" or "pub" or "hotel") AND ("sector" or "compan*" or "commercial" or "firm" "peak bod*" or "business*" or "enterprise*" or "corporat*" or "organisation" or "Industr*") AND ("Aboriginal" or "Indigenous" or "First Nations" or "First Peoples" or "Traditional Owners") AND ("NT" or "Northern Territory" ) NOT "breaking news" NOT "blog" NOT "report"</p> <p>Delimiters:<br/>Date 01/07/2015-01/07/2025<br/>Language: English<br/>Source: Australian Broadcasting Corporation Web-Sources Only</p>                                                |
| Food<br>(Newsbank)                    | <p>("food" or "grocer*" or "supermarket*" or "fast food" or "junk food" or "store*" or "retail" or "shop") AND ("sector" or "compan*" or "commercial" or "firm" "peak bod*" or "business*" or "enterprise*" or "corporat*" or "organisation" or "Industr*") AND ("Aboriginal" or "Indigenous" or "First Nations" or "First Peoples" or "Traditional Owners") AND ("NT" or "Northern Territory" ) NOT "breaking news" NOT "blog" NOT "report"</p> <p>Delimiters:<br/>Date 01/07/2015-01/07/2025<br/>Language: English<br/>Source: Australian Broadcasting Corporation Web-Sources Only</p>                                        |
| Extractive<br>resources<br>(Newsbank) | <p>("mining" or "mine*" or "extractive resource*" or "mineral" or "energy" or "renewable*" or "resource extract*" or "fracking" or "exploration") AND ("sector" or "compan*" or "commercial" or "firm" "peak bod*" or "business*" or "enterprise*" or "corporat*" or "organisation" or "Industr*") AND ("Aboriginal" or "Indigenous" or "First Nations" or "First Peoples" or "Traditional Owners") AND ("NT" or "Northern Territory" ) NOT "breaking news" NOT "blog" NOT "report"</p> <p>Delimiters:<br/>Date 01/07/2015-01/07/2025<br/>Language: English<br/>Source: Australian Broadcasting Corporation Web-Sources Only</p> |
